# Supplementary material
Source: publisher figshare collection journal article supplement (https://gsajournals.figshare.com/ndownloader/files/23535002)
Supplement: Supplementary file 1 [file 23535002]

**Table S1. Details of the seven previously identified sex-associated markers included on the ~65K Nile tilapia SNP array. For each SNP locus, linkage group, position, reference and alternate allele, and flanking candidate genes are shown.**

| **SNP_ID** | **LG** | **RefSeq** | **Position (bp)** | **Ref_allele** | **Alt_allele** | **Candidate genes** |
| --- | --- | --- | --- | --- | --- | --- |
| Oni20117b | 1 | NC_031965.2 | 20319589 | C | T | *dennd5a, adma, ipo7* |
| Oni61067b | 1 | NC_031965.2 | 22909656 | A | G | *fes, strc, got2* |
| Oni23063_1b | 1 | NC_031965.2 | 24341990 | C | T | *elp4, rcn1, pax6* |
| Oni23063_2b | 1 | NC_031965.2 | 24342023 | A | G | *elp4, rcn1, pax6* |
| Oni28137b | 1 | NC_031965.2 | 24628118 | G | T | *csmd1, vps26a, ddx21* |
| Oni22734b | 1 | NC_031965.2 | 25863411 | A | G | *itsn2b, cnst, cgref1* |
| Oni3161a | 20 | NC_031984.2 | 16097472 | C | T | *emilin3, prpf6, spata2* |

aPalaiokostas et al. 2015

bPalaiokostas et al. 2013
